# Supplementary material for: The Role of Health Beliefs and HPV Self-Testing in Cervical Cancer Screening Participation in Czechia
Source: Research Square preprint supplement (doi:10.21203/rs.3.rs-7719792/v1), 2025-11-03
Supplement: Supplementary file 1 [file 6c4245d69f6b2631957e3a37.docx]

**The Role of Health Beliefs and HPV Self-Testing in Cervical Cancer Screening Participation in Czechia**

Kristina Janousková,PhD, Jirí Frei, PhD, Denis Mainz, PhD, Klára Papežová, PhD, Juliana Melichova, PhD, Dominika Plancíková, PhD, Patrik Sivco, PhD, Marek Majdan, PhD

**Supplementary Material**

**Supplementary Table 1: Demographic and health related characteristics of the sample (n=1500)**

| **Characteristic** | **Value** |
| --- | --- |
| **Age** (mean, 95%CI) | 43.6 (42.9-44.1) |
| **Age Categories** (n, %) |  |
| 23-34 years | 369 (25%) |
| 35-54 years | 791 (53%) |
| 55-64 years | 340 (23%) |
| **Region** (n, %) |  |
| Prague | 191 (13%) |
| Czechia | 732 (49%) |
| Moravia | 577 (39%) |
| **Town population** (n, %) |  |
| <5000 inhabitants | 486 (32%) |
| 5000 or more | 1014 (68%) |
| **Education** (n, %) |  |
| Elementary school | 67 (4%) |
| Middle school | 993 (66%) |
| University | 440 (29%) |
| **Occupation** (n, %) |  |
| Employee | 986 (66%) |
| Entrepreneur | 93 (6%) |
| Student | 40 (3%) |
| Maternal | 155 (10%) |
| Retired (medical grounds) | 68 (5%) |
| Retired | 30 (2%) |
| Unemployed | 97 (7%) |
| Other | 31 (2%) |
| **Marital status** (n, %) |  |
| Single | 287 (19%) |
| Partnership | 399 (27%) |
| Married | 517 (35%) |
| Divorced | 274 (18%) |
| Widow | 23 (2%) |
| **Children** (n, % Yes) | 1085 (72%) |
| **Number of children** (median, IQR) | 2 (1-2) |
| **Personal income** (n, %) |  |
| <20,000 | 408 (27%) |
| 20,000-30,000 | 511 (34%) |
| 30,001-40,000 | 293 (20%) |
| >40,000 | 135 (9%) |
| No answer | 153 (10%) |
| **Household income** (n, %) |  |
| <40,000 | 430 (29%) |
| 40,000-60,000 | 443 (30%) |
| 60,001-80,000 | 300 (20%) |
| >80,000 | 159 (11%) |
| No answer | 168 (11%) |
| **Prior HPV infection** (n, %) |  |
| Yes | 90 (6%) |
| No | 1263 (84%) |
| Unknown | 147 (10%) |
| **HPV vaccination** (n, %) |  |
| Yes, both doses | 192 (13%) |
| Yes, incomplete | 35 (2%) |
| No | 1132 (76%) |
| Unknown | 141 (9%) |
| **Cervical cancer in family** (n, %) |  |
| Yes | 102 (7%) |
| No | 1240 (83%) |
| Unknown | 158 (11%) |
| **Chronic diseases** (n, %) |  |
| Yes | 423 (28%) |
| No | 1006 (67%) |
| Unknown | 71 (5%) |
